# Supplementary material
Source: Springer Nature journal article supplement (https://www.springermedizin.de/resource/supplementary/12911_2011_538_MOESM4_ESM.pdf/9526104)

**A** $\gamma$ -GTP (IU/L) $r = 0.269$   
 $P \text{ value} = 6.82 \times 10^{-4}$ 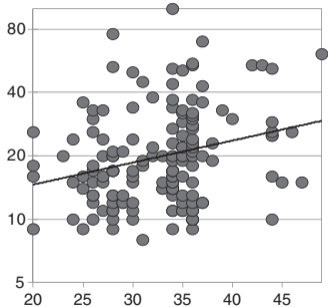

Age (years)

**B** $\gamma$ -GTP (IU/L) $r = 0.112$   
 $P \text{ value} = 9.33 \times 10^{-14}$ 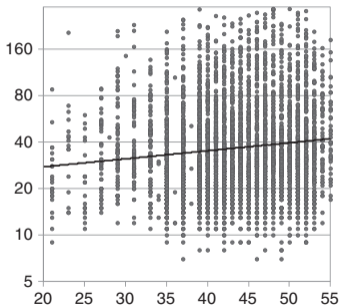

Age (years)

Supplement: MOESM4 [file 9526104]
